# Supplementary material for: Structural and photophysical properties of trianionic nine-coordinated near-IR emitting 8-hydroxyquinoline-based complexes
Source: Royal Society of Chemistry journal article supplement (doi:10.1039/c0dt00225a), 2010-01-01
Supplement: c0dt00225a.pdf [file c0dt00225a.pdf]

## Supplementary Information

# Structural and Photophysical Properties of Trianionic Nine-coordinated Near-IR emitting 8-hydroxyquinoline-based Complexes

Gülay Bozoklu, Claire Marchal, Jacques Pécaut, Daniel Imbert and Marinella Mazzanti\*

CEA, INAC, Service de Chimie Inorganique et Biologique (UMR-E 3 CEA-UJF, FR 3200 CNRS), Laboratoire  
de Reconnaissance Ionique et Chimie de Coordination, CEA-Grenoble, 38054 GRENOBLE, Cedex 09, France  
e-mail: [marinella.mazzanti@cea.fr](mailto:marinella.mazzanti@cea.fr)

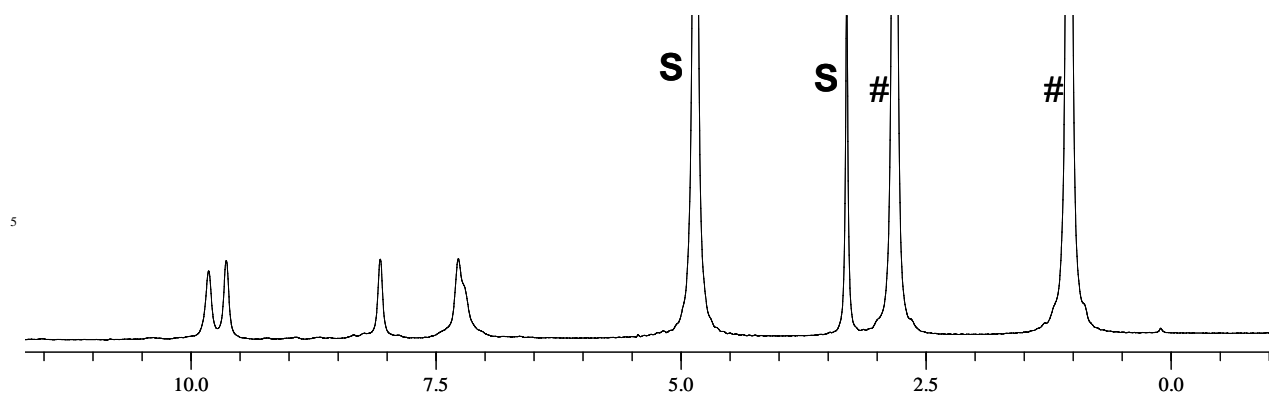

**Figure S1.**  $^1\text{H}$  NMR spectra of a 1:3 Nd:H<sub>2</sub>qt solution after addition of 2 equiv. of triethylamine. Symbols # and S correspond to the signals of triethylammonium and solvents, respectively (0.03 M in ligand CD<sub>3</sub>OD, 400 MHz, 298 K)

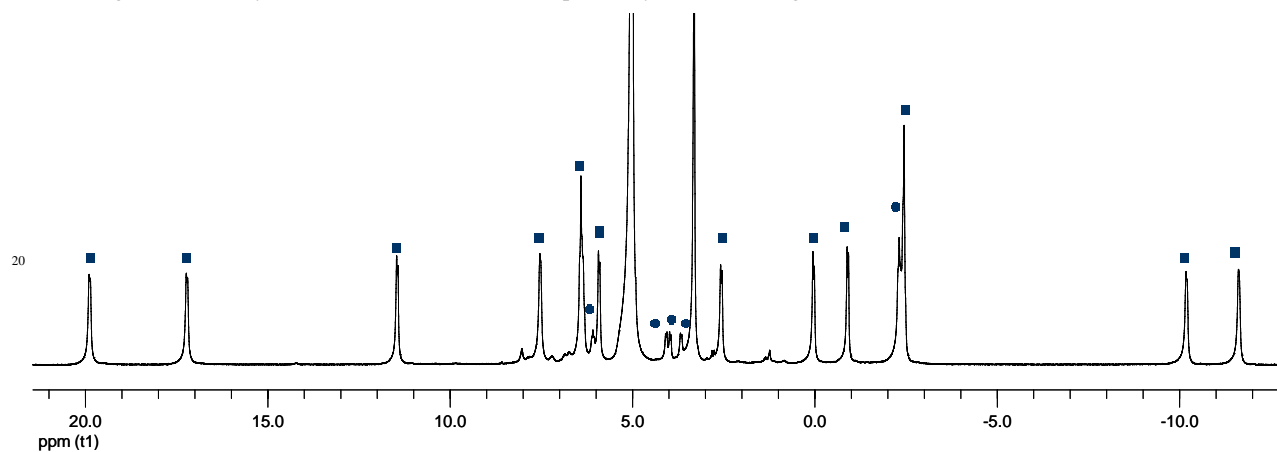

**Figure S2.**  $^1\text{H}$  NMR spectrum of [Yb(hqa)<sub>3</sub>]K<sub>3</sub>, where ● signals corresponds to the syn species and ■ signals corresponds to the anti species. (CD<sub>3</sub>OD, 500 MHz, 298 K).

30

35

40

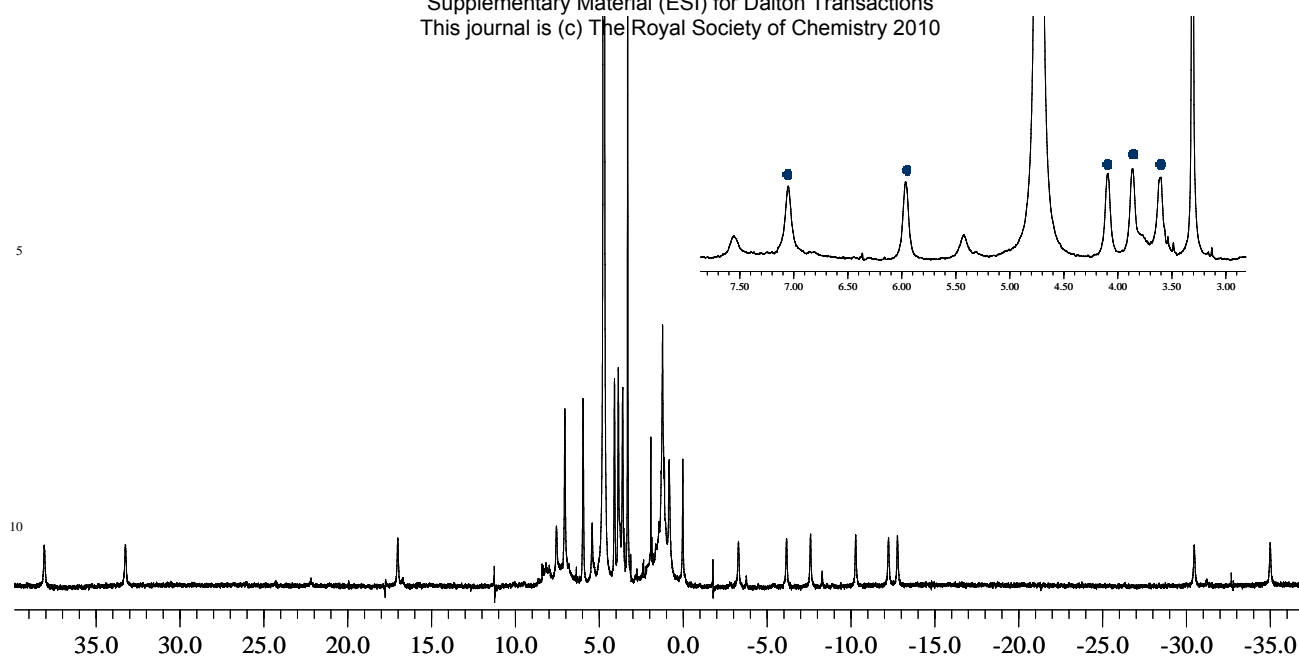

**Figure S3.**  $^1\text{H}$  NMR spectrum of  $[\text{Yb}(\text{hqt})_3]\text{K}_3$ , where  $\bullet$  signals corresponds to the syn species and  $\blacksquare$  signals corresponds to the anti species. ( $\text{D}_2\text{O}$ , 400 MHz, 298 K).
